# Supplementary material for: Enhanced photovoltaic performance of silicon solar cells using a down-shift KCa2Mg2(VO4)3 phosphor
Source: Royal Society of Chemistry journal article supplement (doi:10.1039/d4dt01814a), 2024-01-01
Supplement: d4dt01814a1.pdf [file d4dt01814a1.pdf]

# Supporting Information

## Enhanced Photovoltaic Performance of Silicon Solar Cells Using Down-Shift $\text{KCa}_2\text{Mg}_2(\text{VO}_4)_3$ phosphor

Hong Su<sup>a</sup>, Cong Dou<sup>a</sup>, Fan Dou<sup>b</sup>, Wen Li<sup>a</sup>, Jiachen Li<sup>a</sup>, Xiaolian Chao<sup>c</sup>, Zuipei Yang<sup>c</sup>, Xiaoming Wang<sup>a\*</sup>, Huan Jiao<sup>a\*</sup>

<sup>a</sup> Key Laboratory of Macromolecular Science of Shaanxi Province, Shaanxi Key Laboratory for Advanced Energy Devices, Shaanxi Engineering Laboratory for Advanced Energy Technology, School of Chemistry & Chemical Engineering, Shaanxi Normal University, Xi'an, Shaanxi, 710062, P. R. China

<sup>b</sup> Yantai Shied Materials Technology Co., Ltd, Development Zone, Yantai 264006, Shandong Province, P. R. China

<sup>c</sup> School of Materials Science and Engineering, Shaanxi Normal University, Xi'an, Shaanxi, 710062, P. R. China

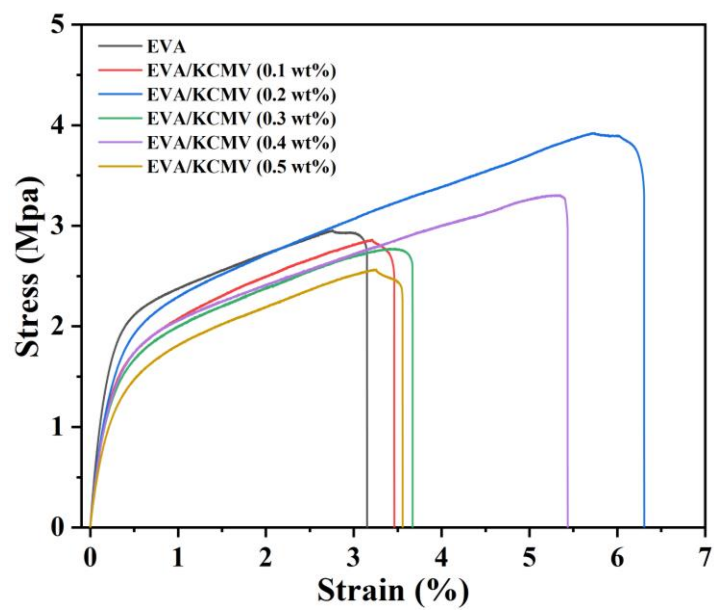

**Fig. S1** Stress-strain curves of EVA/KCMV composite films at different addition ratios.

**Table S1** Refined crystallographic parameters of KCMV phosphors.

| <b>formula</b>                            | <b>KCa<sub>2</sub>Mg<sub>2</sub>(VO<sub>4</sub>)<sub>3</sub></b> |
|-------------------------------------------|------------------------------------------------------------------|
| <b>symmetry</b>                           | <b>Cubic</b>                                                     |
| <b>Space group</b>                        | <b><i>Ia3d</i></b>                                               |
| <b><i>a</i>/Å</b>                         | <b>12.4707(2)</b>                                                |
| <b>Volume/Å<sup>3</sup></b>               | <b>1939.4261(7)</b>                                              |
| <b><i>Z</i></b>                           | <b>8</b>                                                         |
| <b>crystal density (g/cm<sup>3</sup>)</b> | <b>3.5117</b>                                                    |
| <b>structure refinement</b>               | <b>Topas 5.0</b>                                                 |
| <b>temperature/K</b>                      | <b>293</b>                                                       |
| <b>2θ range/deg</b>                       | <b>10-120</b>                                                    |
| <b>Profile function</b>                   | <b>PV_TCHZ</b>                                                   |
| <b><i>R</i><sub>exp</sub></b>             | <b>5.75%</b>                                                     |
| <b><i>R</i><sub>wp</sub></b>              | <b>5.85%</b>                                                     |
| <b><i>R</i><sub>p</sub></b>               | <b>4.57%</b>                                                     |

**Table S2** Refine Atomic coordinates of KCMV from XRD data.

| <b>Atom</b> | <b>Wyckoff site</b> | <b><i>x</i></b>  | <b><i>y</i></b>  | <b><i>z</i></b>  | <b>Occ.</b>  | <b>Beq.</b>     |
|-------------|---------------------|------------------|------------------|------------------|--------------|-----------------|
| <b>Ca1</b>  | <b>24c</b>          | <b>0.375</b>     | <b>0.5</b>       | <b>0.25</b>      | <b>0.667</b> | <b>3.00(7)</b>  |
| <b>K1</b>   | <b>24c</b>          | <b>0.375</b>     | <b>0.5</b>       | <b>0.25</b>      | <b>0.333</b> | <b>3.00(15)</b> |
| <b>Mg1</b>  | <b>16a</b>          | <b>0.5</b>       | <b>0.5</b>       | <b>0</b>         | <b>1</b>     | <b>2.92(9)</b>  |
| <b>V1</b>   | <b>24d</b>          | <b>0.625</b>     | <b>0.5</b>       | <b>0.25</b>      | <b>1</b>     | <b>1.16(5)</b>  |
| <b>O1</b>   | <b>96h</b>          | <b>0.5436(3)</b> | <b>0.5514(2)</b> | <b>0.1573(2)</b> | <b>1</b>     | <b>0.91(7)</b>  |

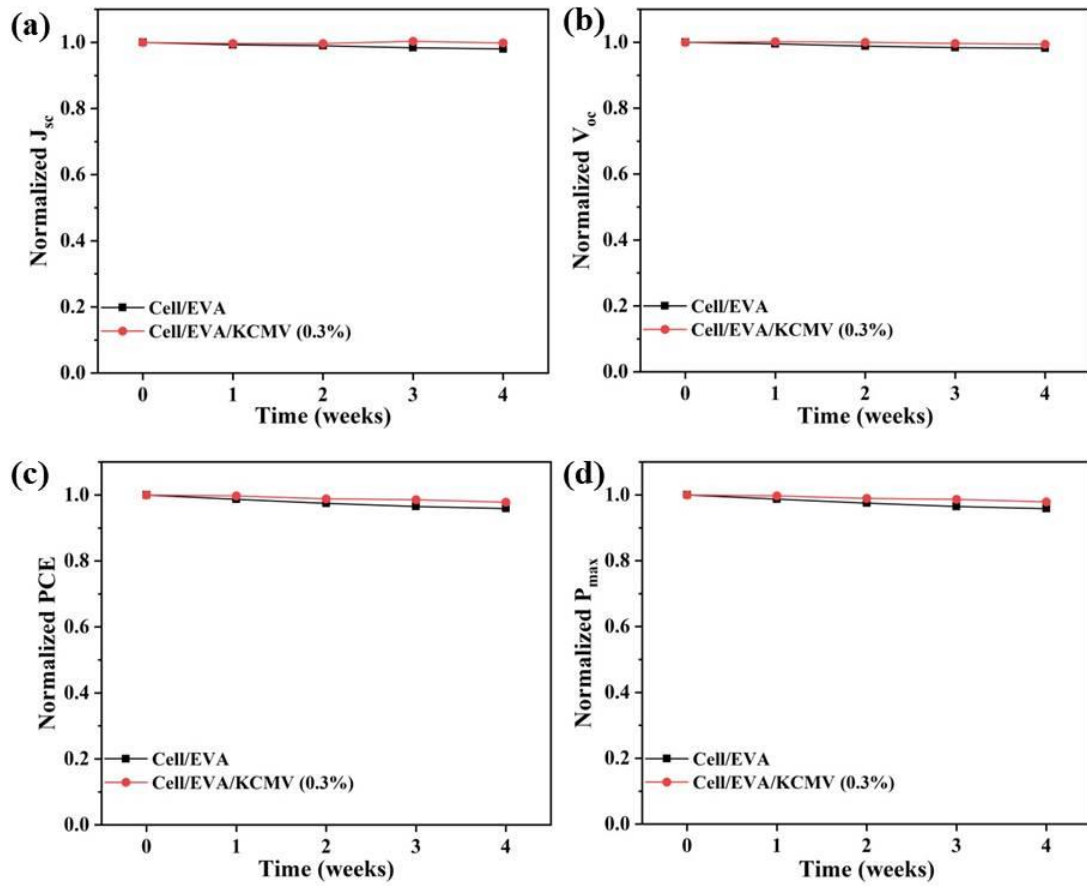

**Fig. S2** The changes of photovoltaic parameters of monocrystalline silicon solar cells assembled with pure EVA and EVA/KCMV (0.3%) under different time ultraviolet light: (a)  $J_{sc}$ . (b)  $V_{oc}$ . (c)  $P_{max}$ . (d) PCE.
